# Supplementary material
Source: PubMed Central journal article supplement (PMC5903210)
Supplement: mic-163-185-s001.pdf [file mic-163-185-s001.pdf]

## SUPPLEMENTARY INFORMATION

### **Lack of formylated methionyl-tRNA has pleiotropic effects on *Bacillus subtilis***

Yanfei Cai<sup>1,2</sup>, Pete Chandrangsul<sup>1</sup>, Ahmed Gaballa<sup>1</sup> and John D. Helmann<sup>1\*</sup>

|          |                                                                                     |
|----------|-------------------------------------------------------------------------------------|
| Table S1 | Strains and Plasmids                                                                |
| Table S2 | Oligonucleotides                                                                    |
| Table S3 | Suppressor mutations of $\Delta defA defB::erm$ double mutant                       |
| FIG S1   | Growth curves of the WT and $\Delta defA defB::erm fnt1$ mutant in MM media         |
| FIG S2   | $\Delta defA defB::erm fnt1$ mutant is sensitive to hydrogen peroxide and PQ stress |
| FIG S3   | $\Delta defA defB::erm fnt1$ mutant is sensitive to iron intoxication               |
| FIG S4   | Disk diffusion assay of WT and mutant strains on methylglyoxal                      |
| FIG S5   | Disk diffusion assay of WT and mutant strains on fosfomycin                         |

SI References

**Table S1** Strains and plasmids (the strains are CU1065 background, unless indicated)

| Strain    | Genotype                                                                                         | Reference  |
|-----------|--------------------------------------------------------------------------------------------------|------------|
| CU1065    | <i>trpC2 att SPβ</i>                                                                             | Lab stock  |
| NCIB 3610 | <i>Marburg undomesticated strain</i>                                                             | (1)        |
| HB21001   | <i>defA::null defB::erm with the deletion of base pair 119A of fnt</i>                           | This study |
| HB21002   | <i>defA::null defB::erm</i>                                                                      | This study |
| HB21003   | <i>defA::erm</i>                                                                                 | This study |
| HB21004   | <i>defB::erm</i>                                                                                 | This study |
| HB21005   | <i>defA::null defB::erm with 909C deleted, G916T and G917T, the DNA from 813 to 905 deleted.</i> | This study |
| HB21006   | <i>fnt::km</i>                                                                                   | This study |
| HB21009   | <i>NCIB3610 fnt::km</i>                                                                          | This study |
| HB21011   | <i>fnt::km katA::tet</i>                                                                         | This study |
| HB21012   | <i>fnt::km yfmC::mls</i>                                                                         | This study |
| HB21014   | <i>fnt::km ahpCF::cat</i>                                                                        | This study |
| HB21015   | <i>fnt::km katA::mls ahpCF::cat</i>                                                              | This study |
| HB21016   | <i>fnt::km P<sub>spac</sub> fnt</i>                                                              | This study |
| HB21017   | <i>NCIB3610 fnt::km P<sub>spac</sub> fnt</i>                                                     | This study |
| HB21018   | <i>fnt::km bshC::mls</i>                                                                         | This study |
| HB5612    | <i>yfmC::mls</i>                                                                                 | (2)        |
| HB14110   | <i>katA::mls</i>                                                                                 | (3)        |
| HB17882   | <i>katA::mls ahpCF::cat</i>                                                                      | (4)        |
| HB17821   | <i>ahpCF::cat</i>                                                                                | (4)        |
| HB11212   | <i>bshC::mls</i>                                                                                 | (5)        |
| pPL82     | Expression of gene under P <sub>spac(hy)</sub> promoter                                          | (6)        |

**Table S2.** Oligonucleotides

| No.  | Name           | Sequence                                             |
|------|----------------|------------------------------------------------------|
| 6863 | defA-up-fwd    | CCGATAGCCAGGATCAAAGAT                                |
| 6864 | defA-do-rev    | GGAGGAGGTGTCAGTACTTT                                 |
| 6865 | defB-up-fwd    | CACCTTTGCGCTAATCGT TG                                |
| 6866 | defB-do-rev    | TTGAATACGTTGGGACAGGC                                 |
| 6891 | fnt-up-fwd     | GACCACTTAGACGGTGTGCT                                 |
| 6892 | fnt-do-rev     | TCAGCAGCAGGTTGCTGTAT                                 |
| 6893 | defB-up-fwd    | CGCGGATCCGTTTTATAGCGTCTTTCACGT                       |
| 6896 | defB-do-rev    | CGCGAATTCTGTTCCCGAACTGAAAGAAAT                       |
| 6897 | defA-up-fwd    | GCGAAGCTTCTCACGTCTTGGAGGGTAA                         |
| 6900 | defA-do-rev    | CGCAGATCTCTTAAAACAGGAACTGAAAAATC                     |
| 7110 | fnt-up-rev(km) | CCTATCACCTCAAATGGTTTCGCTGCAAATCATCCTTCCATA<br>TCCGCT |
| 7111 | fnt-do-fwd(km) | CGAGCGCCTACGAGGAATTTGTATCGACTAGTGTTCGTGA<br>CATCGC   |
| 7112 | fnt-do-rev     | AGCAGCCATTTGGTCAAGCA                                 |
| 7285 | fnt-up-f-ppl82 | GCGAAGCTTATGAACTAGC GGATATGGAA                       |
| 7286 | fnt-do-r-ppl82 | CGCAGATCTTTGTTCTAATTTGATCAGCG                        |

**Table S3** Suppressor mutations of  $\Delta defA defB::erm$ 

| strains                          | <i>fmt</i>   | <i>foldD</i> | <i>glyA</i>                                       |
|----------------------------------|--------------|--------------|---------------------------------------------------|
| $\Delta defA defB::erm fmt1$     | 119A deleted | no           | no                                                |
| $\Delta defA defB::glyA1$        | no           | no           | $\Delta 813$ to 905, $\Delta 909C$ , G916T, G917T |
| $\Delta defA defB::erm (sup3)^*$ | no           | no           | no                                                |

\*This suppressed strain did not have a mutation in any of the three sequenced loci.

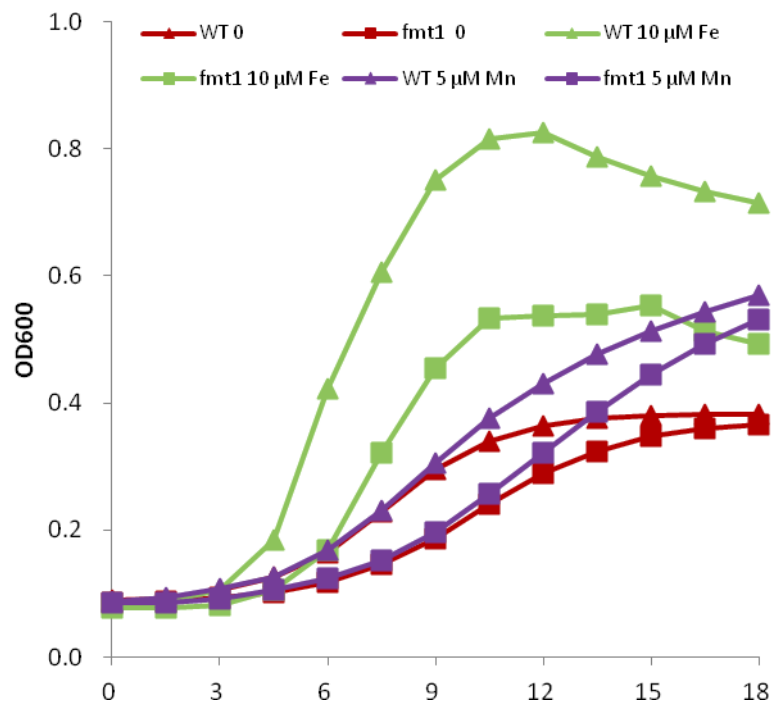

**FIG S1** Growth curves of the WT and  $\Delta defA defB::erm fmt1$  (ffmt1, HB21001) mutant in MM plus different metal (OD<sub>600</sub> at the time indicated in hours). The WT in MM (red triangle), in MM plus 10  $\mu$ M Fe (green triangle), in MM plus 5  $\mu$ M Mn (purple triangle). The *fmt1* mutant in MM (red square), in MM plus 10  $\mu$ M Fe (green square) and MM plus 5  $\mu$ M Mn (purple square).

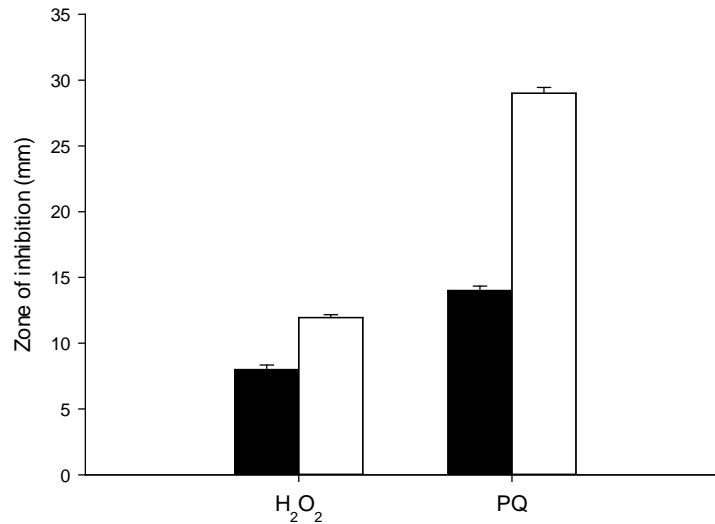

**FIG S2** an  $\Delta defA defB::erm fnt1$  (HB21001) mutant has elevated sensitivity to hydrogen peroxide and PQ. Sensitivity of WT (black column) and  $\Delta defA defB::erm fnt1$  (white column), to hydrogen peroxide stress as monitored using a disk diffusion assay. The results are expressed as the diameter of the inhibition zone (mm) minus the diameter of the filter paper disk (6.5 mm). The disks were spotted with 3  $\mu$ l of 0.8M H<sub>2</sub>O<sub>2</sub> or 5  $\mu$ l of 0.5 M PQ. The mean  $\pm$  SE from at least three biological replicates are reported.

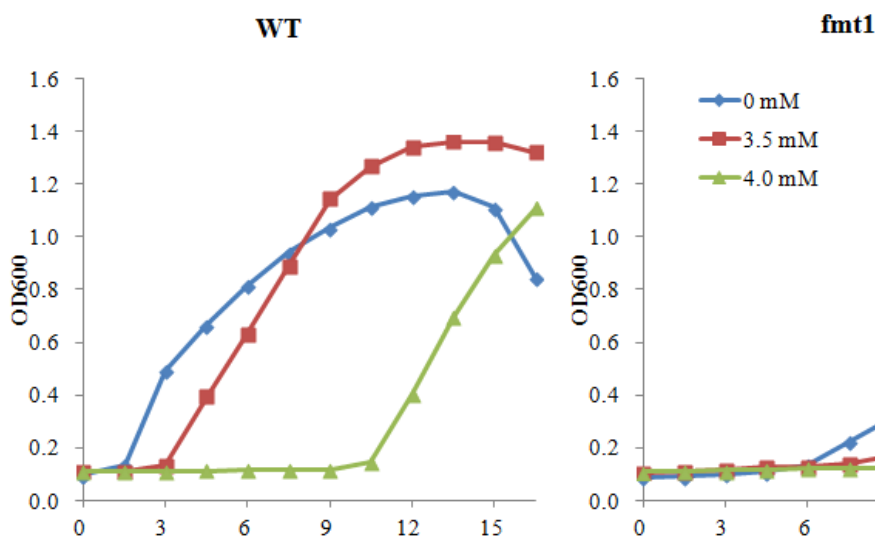

**FIG S3** The  $\Delta defA defB::erm fnt1$  mutant is sensitive to iron intoxication. Growth of WT (CU1065) and  $\Delta defA defB::erm fnt1$  (HB21001) under iron intoxication condition by monitoring cell growth in liquid culture (OD<sub>600</sub> vs. hours). Iron concentration dependence of growth inhibition for the strains in LBC medium amended with various concentrations of FeSO<sub>4</sub> (added from a 100 mM stock prepared in 0.1 N HCl). Growth inhibition is apparent with 3.5 mM Fe(II) (red square) and 4 mM Fe(II) (green triangle). Growth curves are an average of four cultures monitored in parallel (technical replicates), and the results are representative of experiments performed at least three times.

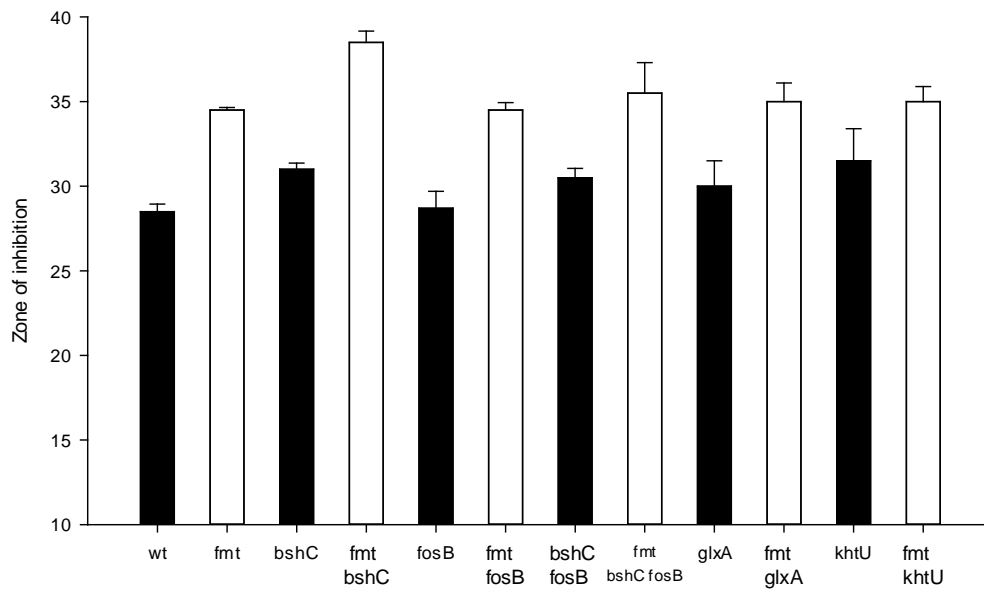

**FIG S4** Disk diffusion assay of WT (WT; CU1065; black bars) and mutant strains on Methylglyoxal (MG, 22  $\mu$ mol). The results are expressed as the diameter of the inhibition zone (mm) minus the diameter of the filter paper disk (6.5 mm). The mean  $\pm$  SE from at least three biological replicates are reported.

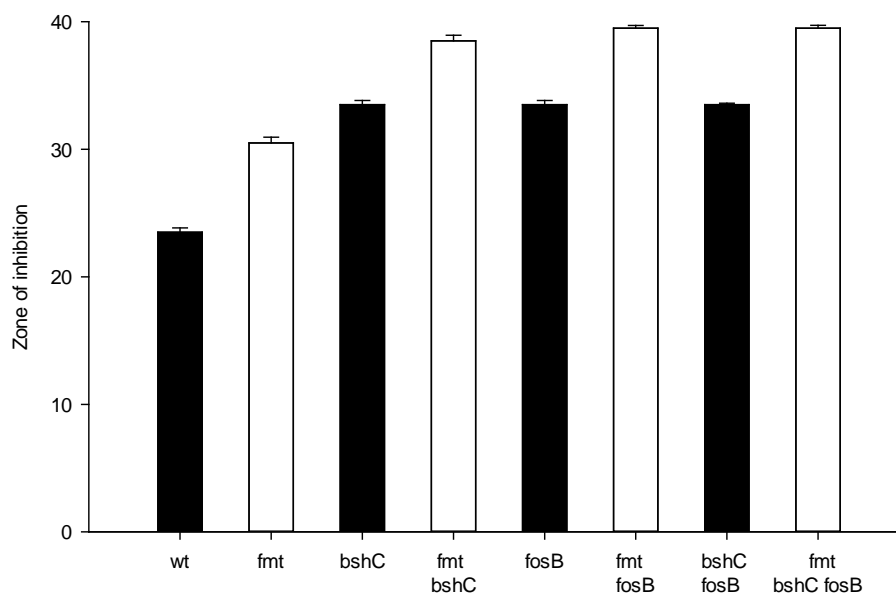

**FIG S5** Disk diffusion assay of WT (WT; CU1065; black bars) and mutant strains on fosfomycin (250  $\mu$ g). The results are expressed as the diameter of the inhibition zone (mm) minus the diameter of the filter paper disk (6.5 mm). The mean  $\pm$  SE from at least three biological replicates are reported.

#### SI Bibliography and References Cited

1. **Branda SS, Gonzalez-Pastor JE, Ben-Yehuda S, Losick R, Kolter R.** 2001. Fruiting body formation by *Bacillus subtilis*. *Proc Natl Acad Sci U S A* **98**:11621-11626.
2. **Ollinger J, Song KB, Antelmann H, Hecker M, Helmann JD.** 2006. Role of the Fur regulon in iron transport in *Bacillus subtilis*. *J Bacteriol* **188**:3664-3673.
3. **Faulkner MJ, Ma Z, Fuangthong M, Helmann JD.** 2012. Derepression of the *Bacillus subtilis* PerR peroxide stress response leads to iron deficiency. *J Bacteriol* **194**:1226-1235.
4. **Guan G, Pinochet-Barros A, Gaballa A, Patel SJ, Arguello JM, Helmann JD.** 2015. PfeT, a P1B4 - type ATPase, effluxes ferrous iron and protects *Bacillus subtilis* against iron intoxication. *Mol Microbiol* **98**:787-803.
5. **Gaballa A, Chi BK, Roberts AA, Becher D, Hamilton CJ, Antelmann H, Helmann JD.** 2014. Redox regulation in *Bacillus subtilis*: the bacilliredoxins BrxA(YphP) and BrxB(YqiW) function in de-bacillithiolation of S-bacillithiolated OhrR and MetE Antioxid Redox Signal **21**:357-367 .
6. **Quisel JD, Burkholder WF, Grossman AD.** 2001. In vivo effects of sporulation kinases on mutant Spo0A proteins in *Bacillus subtilis*. *J Bacteriol* **183**:6573-6578.
